# Supplementary material
Source: publisher figshare collection journal article supplement (https://gsapubs.figshare.com/ndownloader/files/22411683)
Supplement: Supplementary file 1 [file 22411683]

Archive with 2 entries (2 files):
- loose files/Supp references cited.docx
- loose files/SuppFile.pdf
