# Supplementary material
Source: publisher figshare collection journal article supplement (https://gsapubs.figshare.com/ndownloader/files/22411683)
Supplement: Supplementary file 1 [file 22411683 › loose files/Supp references cited.docx]

**Supplemental References Cited**

Dalrymple, G.B., and Duffield, W.A., 1988, High precision 40Ar/39Ar dating of Oligocene rhyolites from the Mogollon-Datil volcanic field using a continuous laser system: Geophysical Research Letters, v. 15, p. 463–466, https://doi.org/10.1029/GL015i005p00463.

Onstott, T.C., Miller, M.L., Ewing, R.C., and Walsh, D., 1995, Recoil refinements: Implications for the 40Ar/39Ar dating technique: Geochimica et Cosmochimica Acta, v. 59, p. 1821–1834, https://doi.org/10.1016/0016-7037(95)00085-E.

Turner, G., and Cadogan, P.H., 1974, Possible effects of 39Ar recoil in 40Ar-39Ar dating: Geochimica et Cosmochimica Acta, v. 2, supplement, p. 1601–1615.
